# Supplementary material for: Detailed characterization of dioxouranium(vi) complexes with a symmetrical tetradentate N2O2-benzil bis(isonicotinoyl hydrazone) ligand
Source: Royal Society of Chemistry journal article supplement (doi:10.1039/d0dt02014a), 2020-01-01
Supplement: d0dt02014a1.pdf [file d0dt02014a1.pdf]

## Detailed Characterization of Dioxouranium(VI) Complexes with a Symmetrical Tetradentate N<sub>2</sub>O<sub>2</sub>-benzil bis(isonicotinoyl hydrazone) Ligand

Sipun Sethi,<sup>a</sup> Rachita Panigrahi,<sup>b</sup> Avijit Kumar Paul,<sup>c</sup> Bhabani S. Mallik,<sup>b</sup> Purnendu Parhi,<sup>d</sup> Pradeep Kumar Das,<sup>e</sup> and Nabakrushna Behera<sup>\*,a</sup>

<sup>a</sup>School of Chemistry, Sambalpur University, Jyoti Vihar, 768 019, Sambalpur, Odisha, India

<sup>b</sup>Department of Chemistry, Indian Institute of Technology Hyderabad, Kandi-502285, Sangareddy, Telangana, India.

<sup>c</sup>National Institute of Technology, Kurukshetra, 136119, Haryana, India

<sup>d</sup>Ravenshaw University, Cuttack, 753003, Odisha, India

<sup>e</sup>Department of Chemistry, N. C. Autonomous College, Jajpur, 755001, Odisha, India

\*Corresponding author's e-mail id: [nkbehera@suniv.ac.in](mailto:nkbehera@suniv.ac.in)

### Electronic Supplementary Information (ESI†)

#### Table of Contents

**Fig. S1:** Mass spectrum of uranyl complex 1

**Fig. S2:** Mass spectrum of uranyl complex 2

**Fig. S3:** Mass spectrum of uranyl complex 3

**Fig. S4:** FT-IR spectrum of H<sub>2</sub>L

**Fig. S5:** FT-IR spectrum of uranyl complex 1

**Fig. S6:** FT-IR spectrum of uranyl complex 2

**Fig. S7:** FT-IR spectrum of uranyl complex 3

**Fig. S8:** Thermal decomposition diagram of 1.

**Fig. S9:** Thermal decomposition diagram of 3.

**Fig. S10:** Cyclic voltammogram of H<sub>2</sub>L at its 1 x 10<sup>-3</sup> M CHCl<sub>3</sub> solution with added ferrocene (Fc) using [Bu<sub>4</sub>N][ClO<sub>4</sub>] (0.1M) as supporting electrolyte, scan rate: 100mV/sec, initial scan direction: cathodic.

**Fig. S11:** Powder XRD pattern of complex 1

**Fig. S12:** Powder XRD pattern of complex 2

**Fig. S13:** Powder XRD pattern of complex 3

**Fig. S14:** Diagram showing the crystallite size of complexes 1-3.

Geometry of the ligand in XYZ format.

Geometry of the complex 1 in XYZ format.

**Fig. S1:** Mass spectrum of uranyl complex **1**

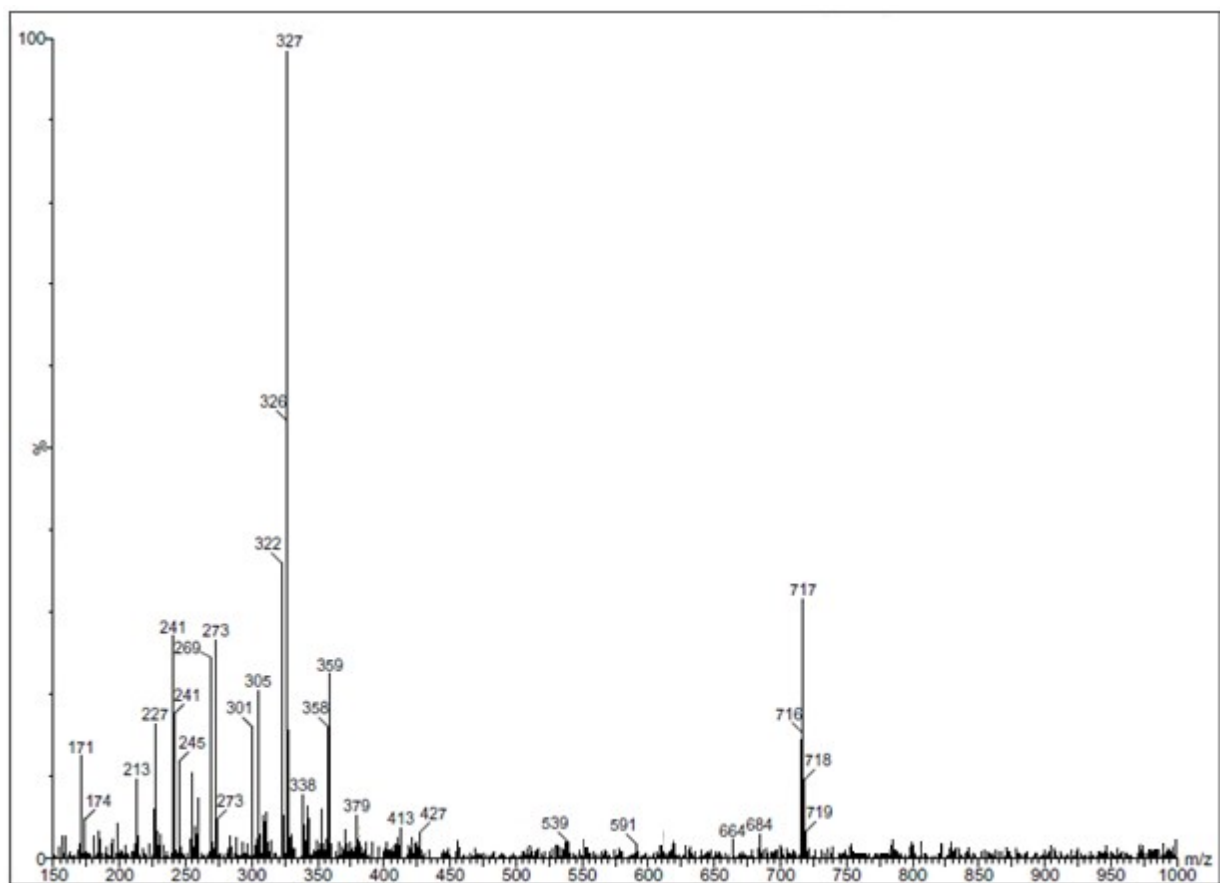

**Fig. S2:** Mass spectrum of uranyl complex **2**

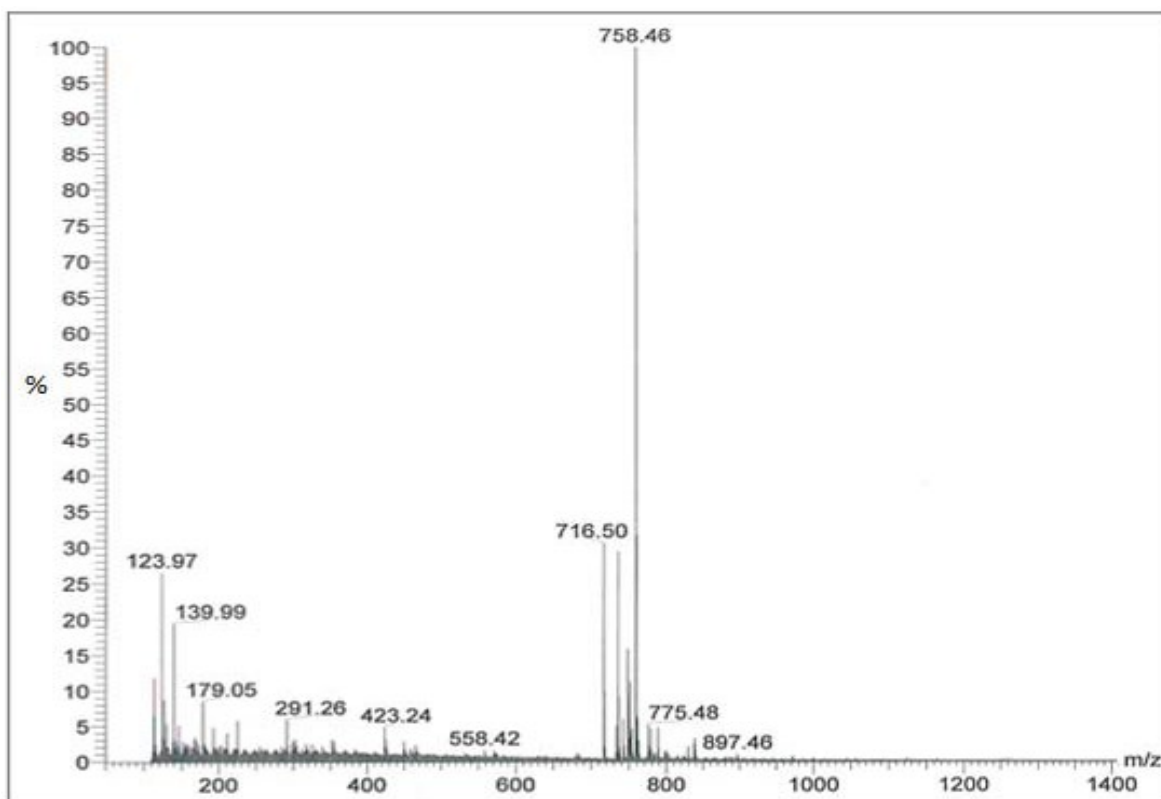

**Fig. S3:** Mass spectrum of uranyl complex **3**

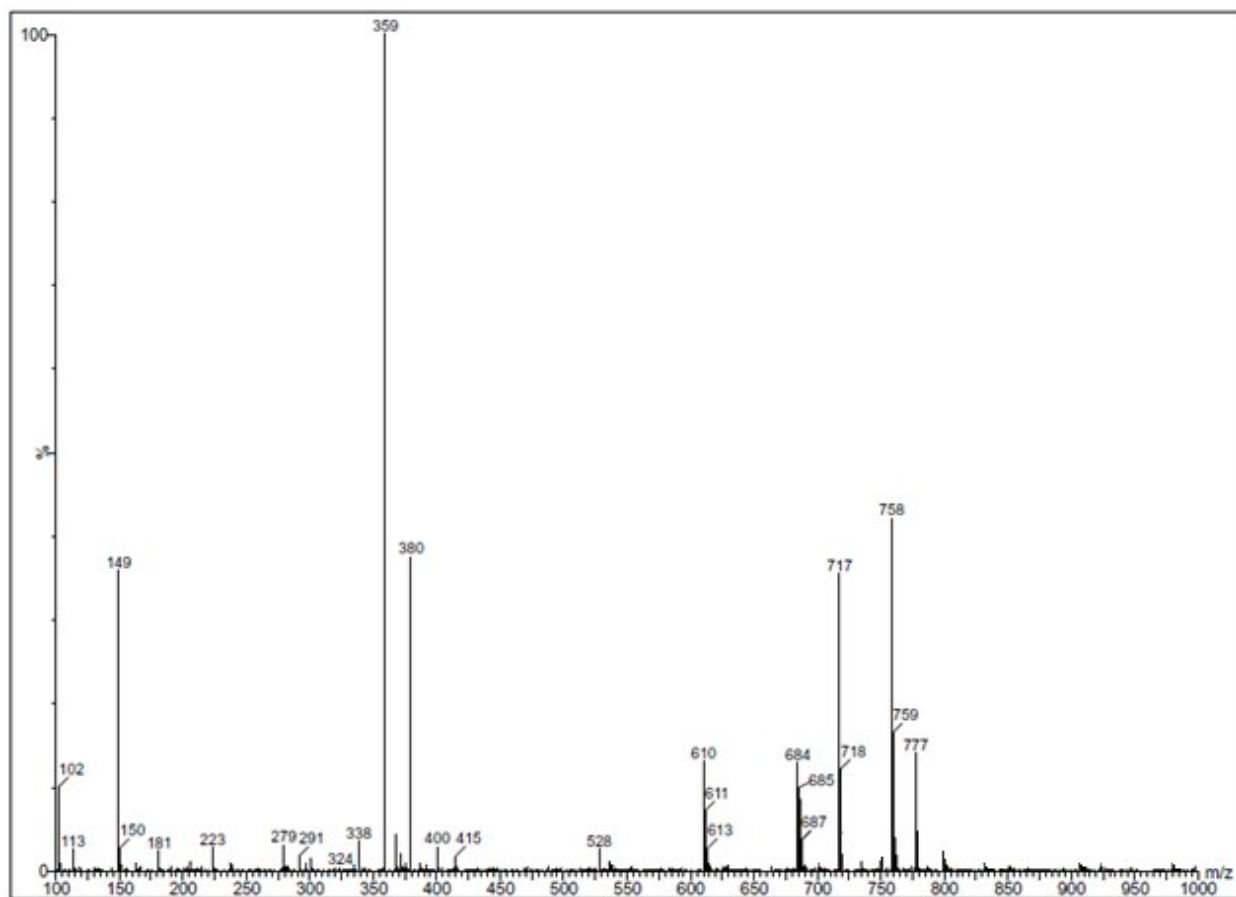

**Fig. S4:** FT-IR spectrum of H<sub>2</sub>L

(a)

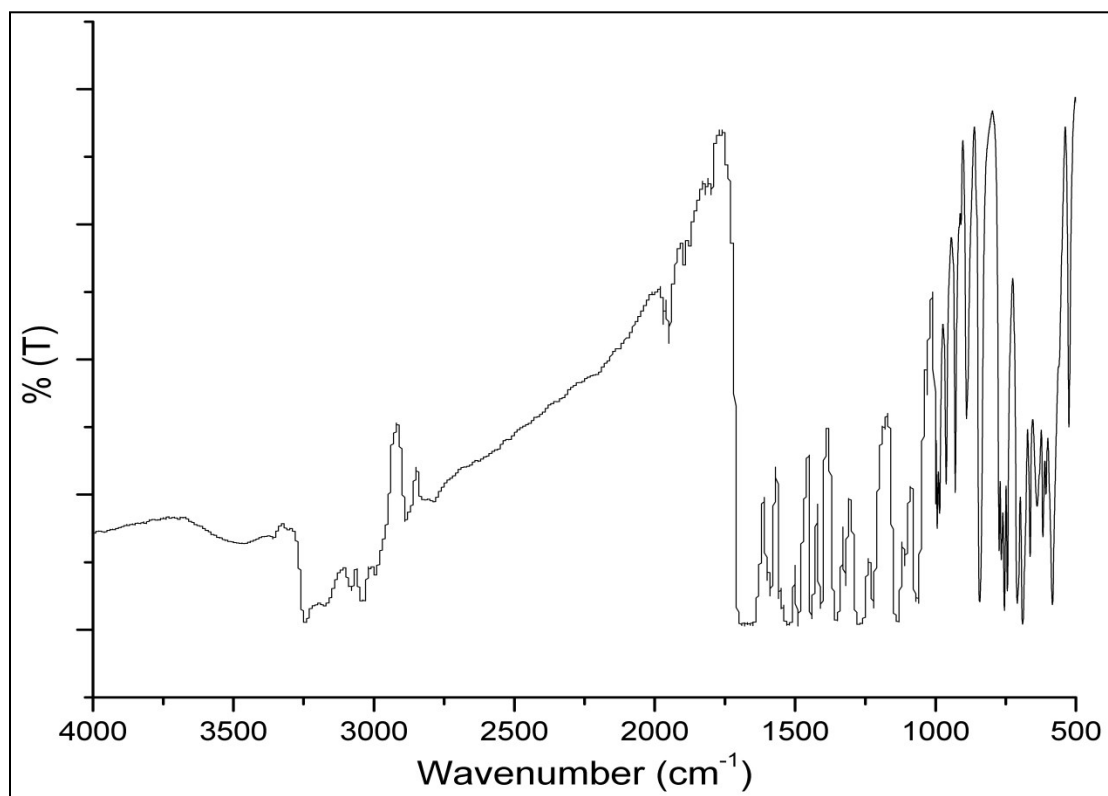

(b)

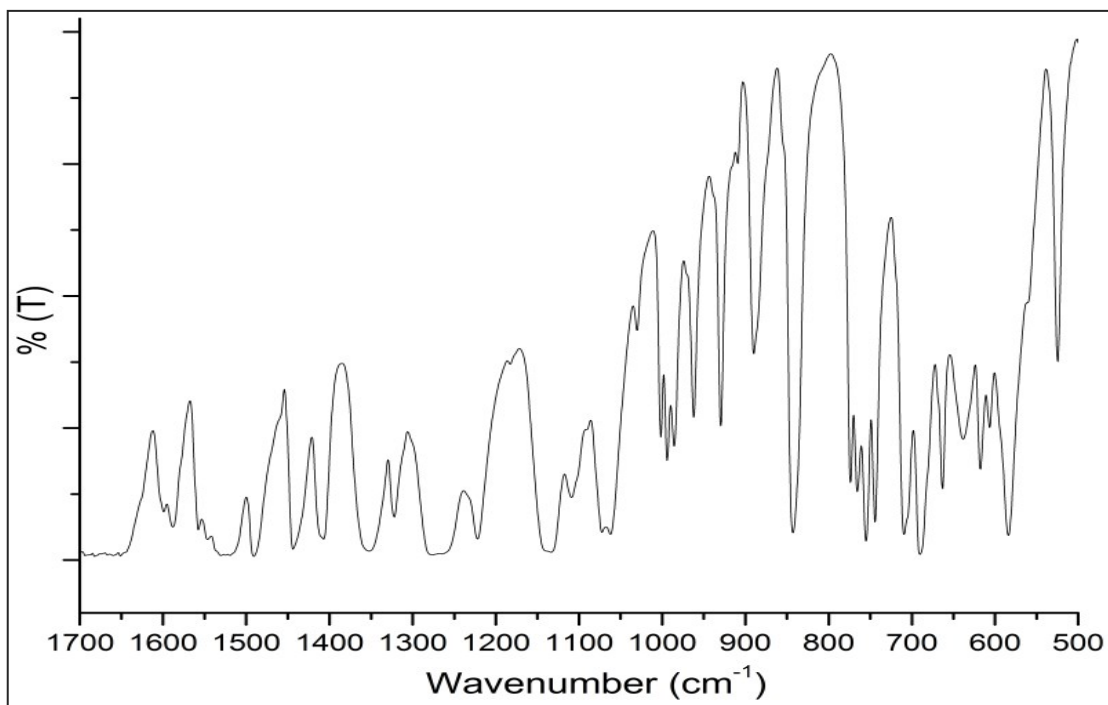

**Fig. S5:** FT-IR spectrum of uranyl complex **1**

(a)

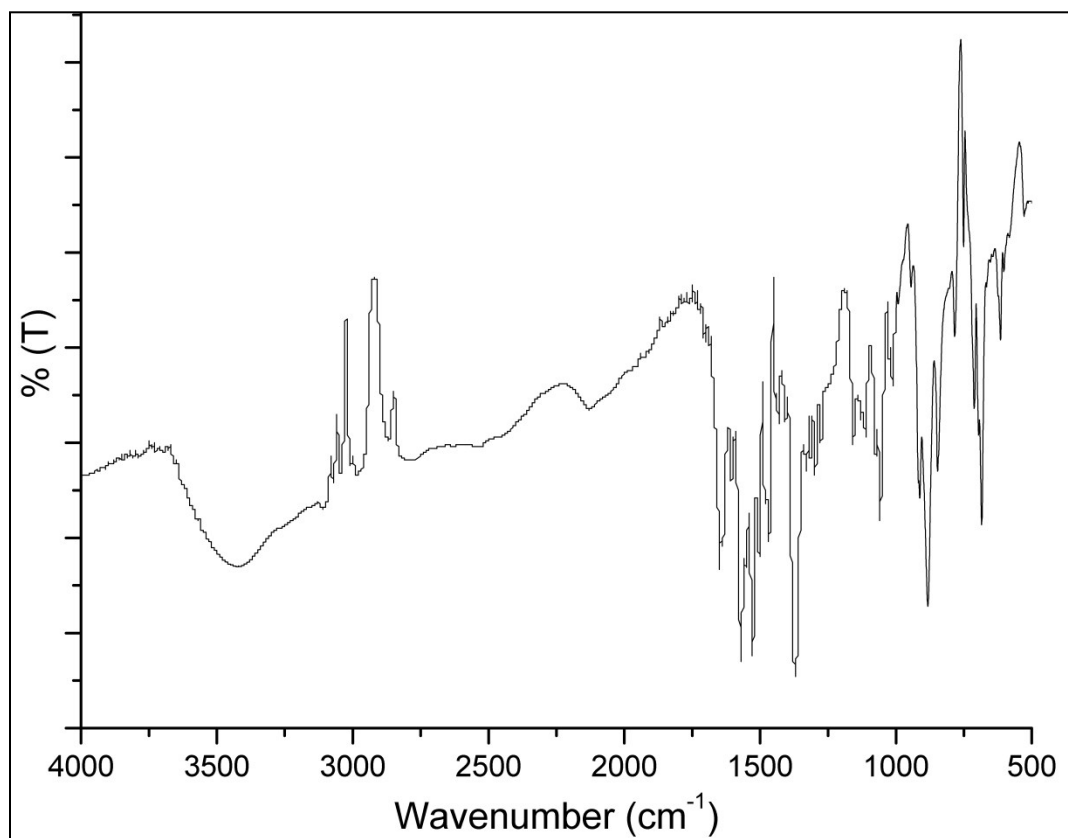

(b)

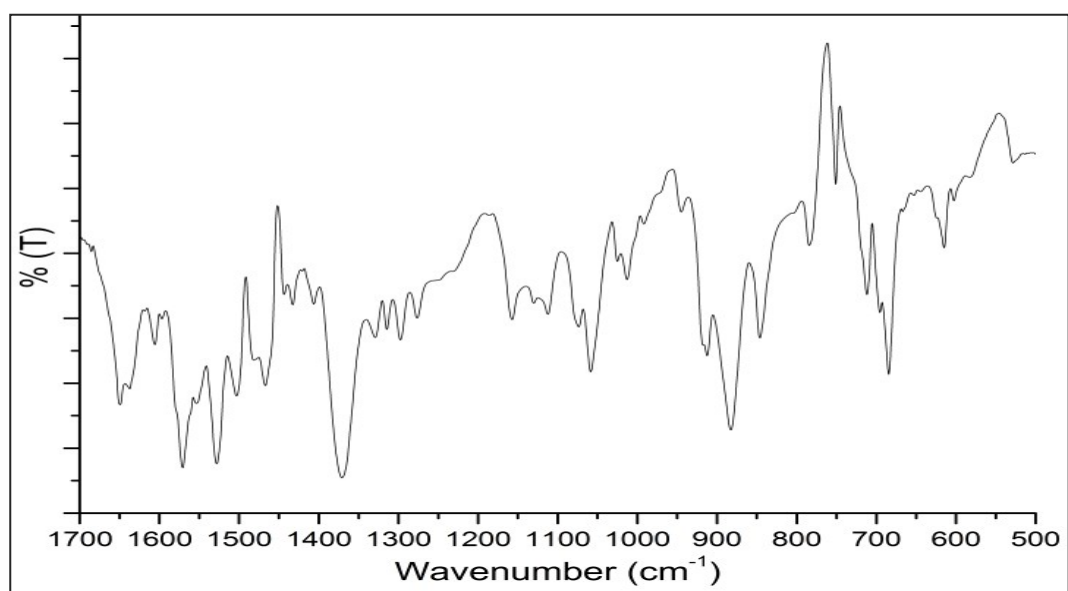

**Fig. S6:** FT-IR spectrum of uranyl complex **2**

(a)

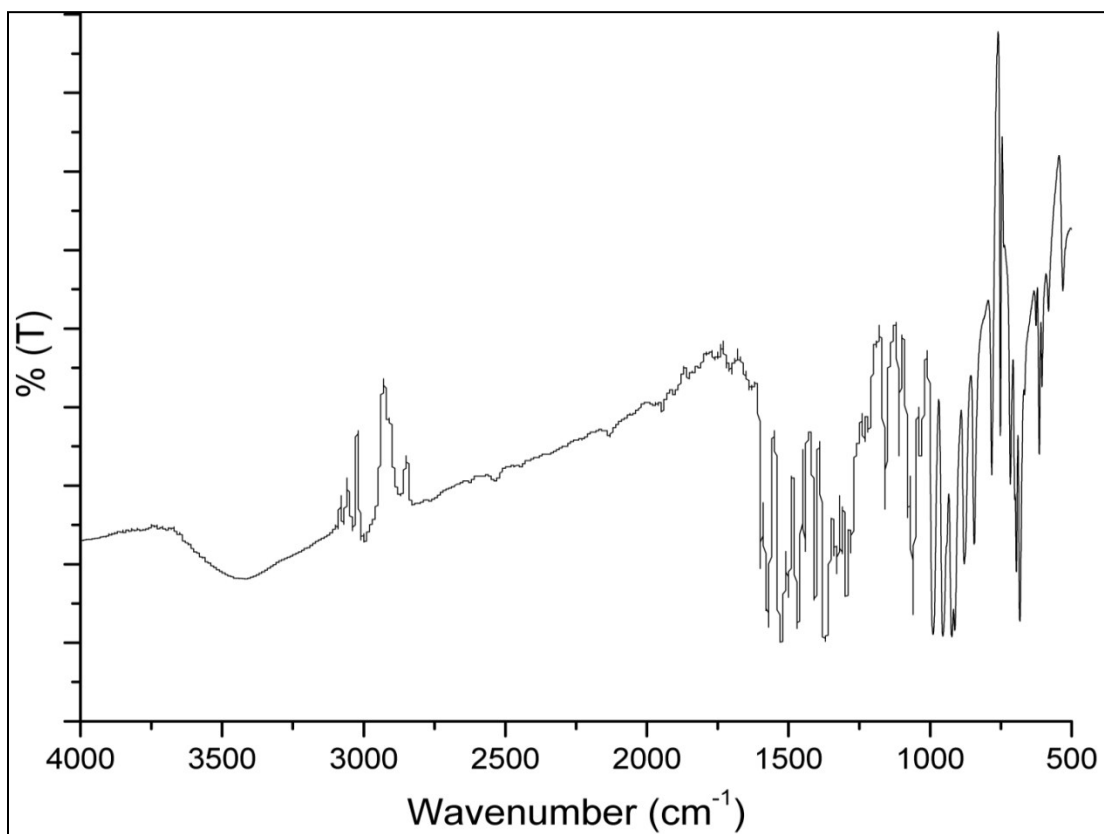

(b)

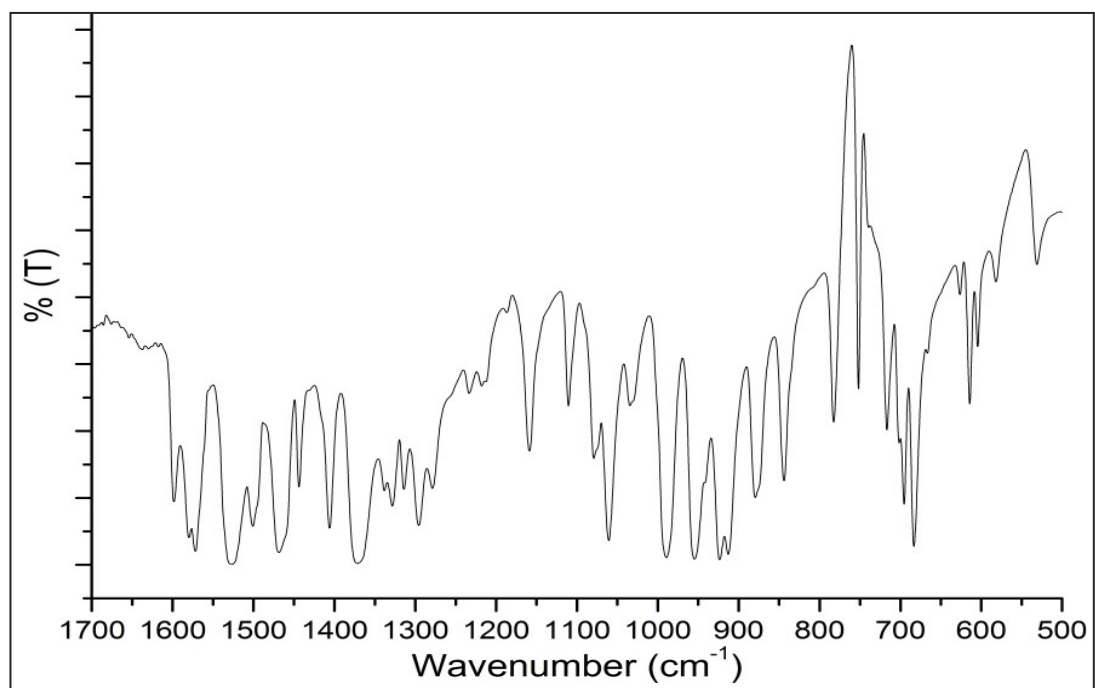

**Fig. S7:** FT-IR spectrum of uranyl complex **3**

(a)

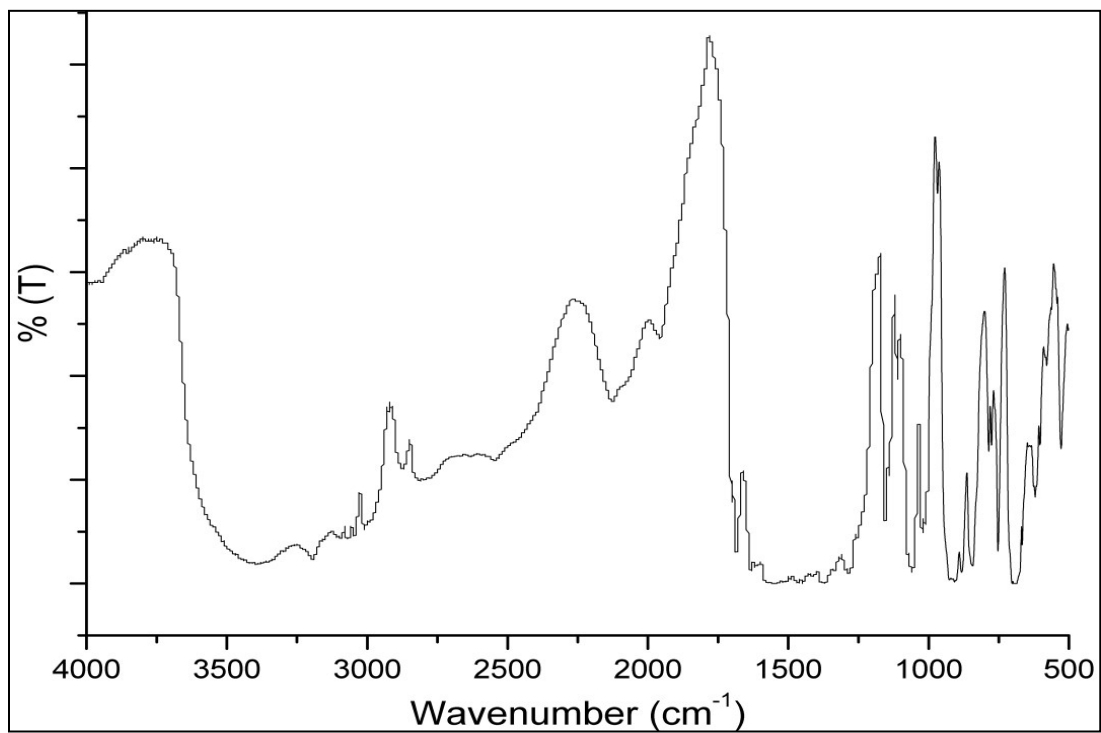

(b)

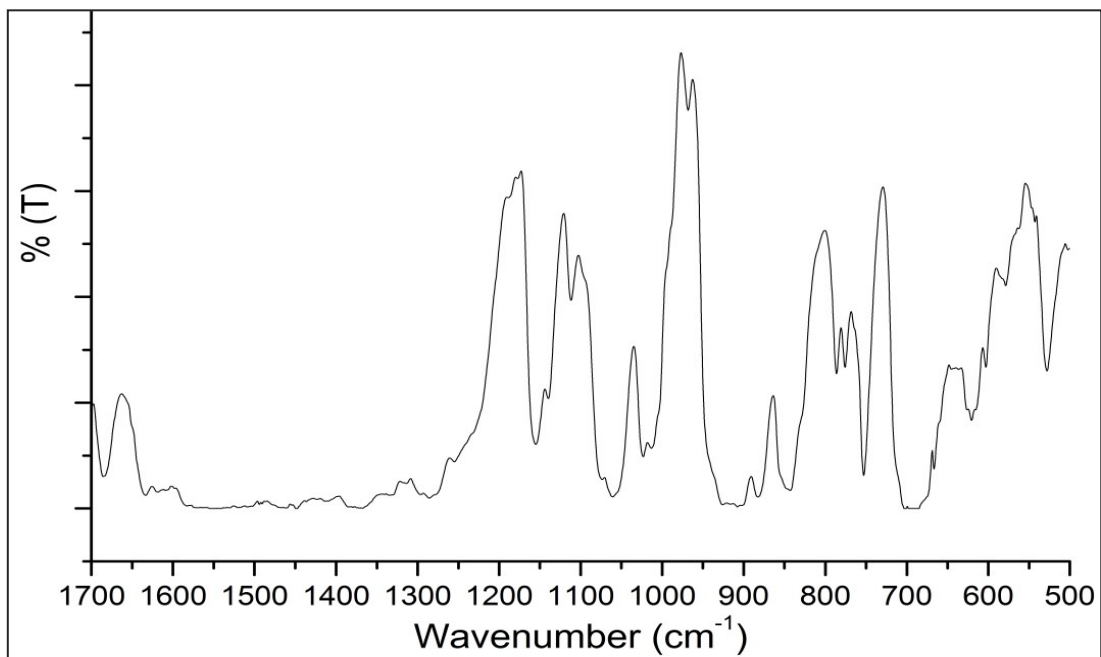



Fig. S8: Thermal decomposition diagram of 1.

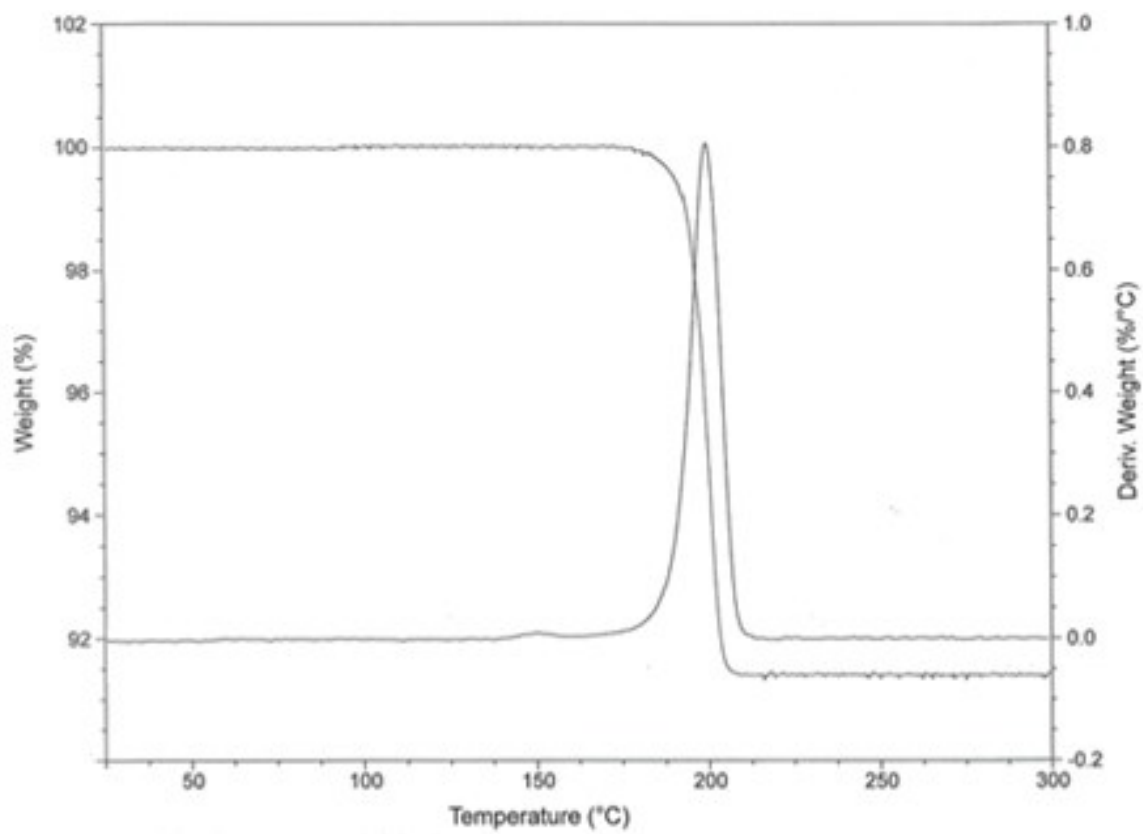

**Fig. S9:** Thermal decomposition diagram of **3**.

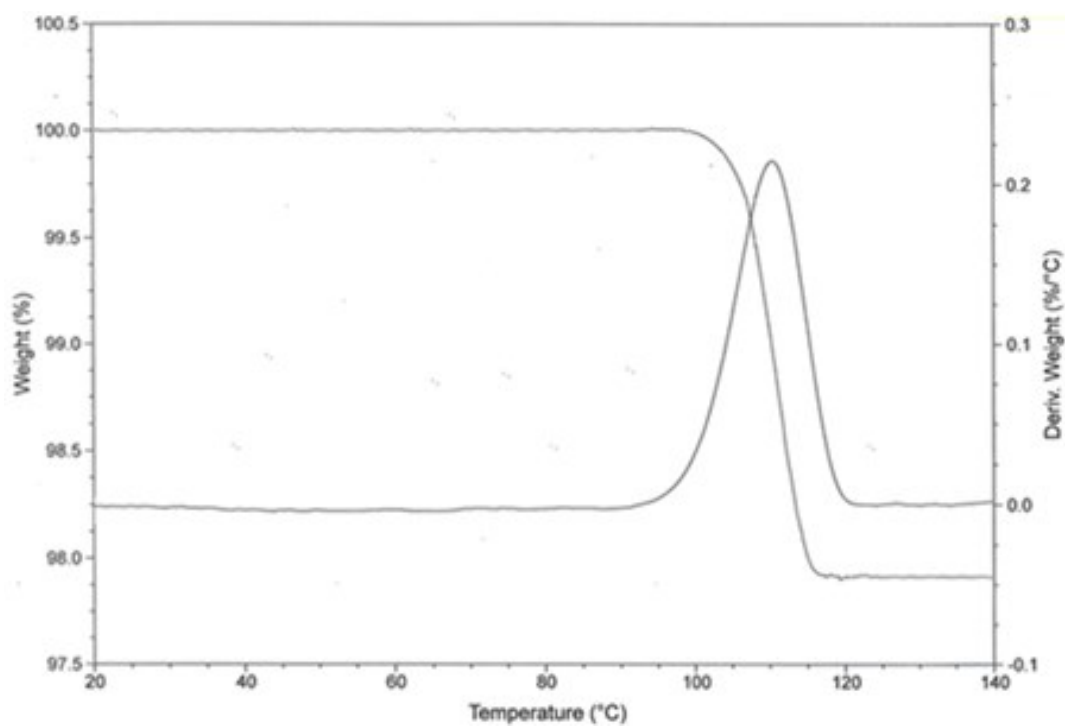

**Fig. S10:** Cyclic voltammogram of  $H_2L$  at its  $1 \times 10^{-3}$  M  $CHCl_3$  solution with added ferrocene (Fc) using  $[Bu_4N][ClO_4]$  (0.1M) as supporting electrolyte, scan rate: 100mV/sec, initial scan direction: cathodic.

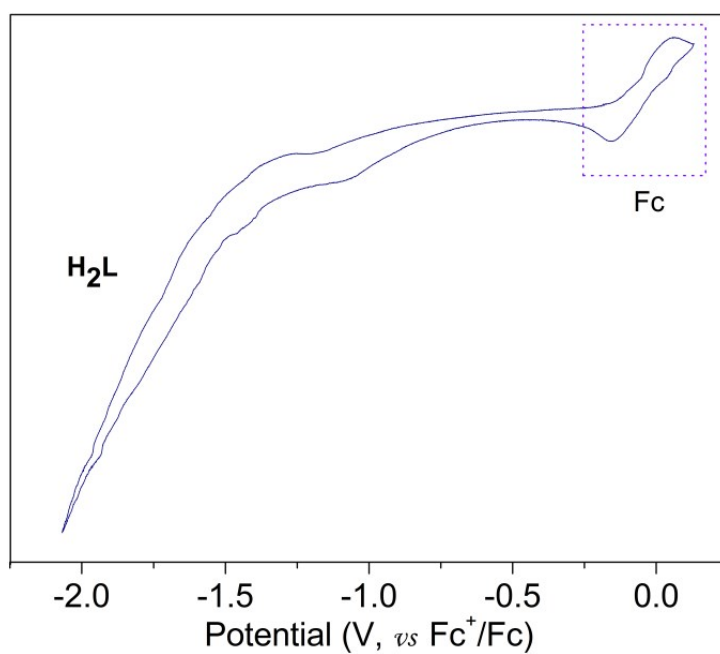

**Fig. S11:** Powder XRD pattern of complex 1

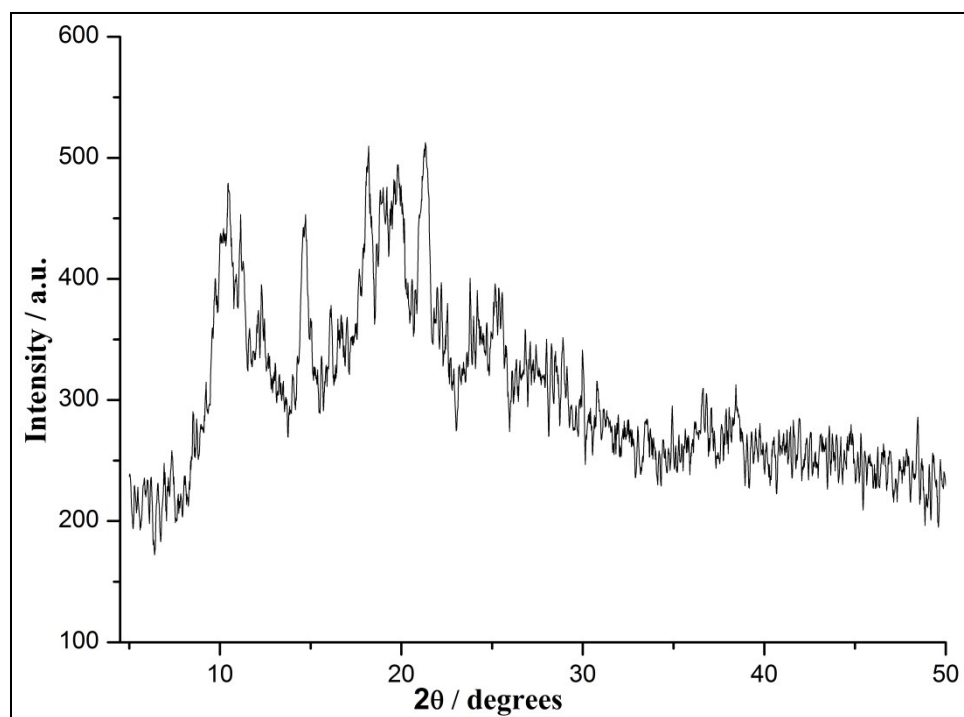

**Fig. S12:** Powder XRD pattern of complex 2

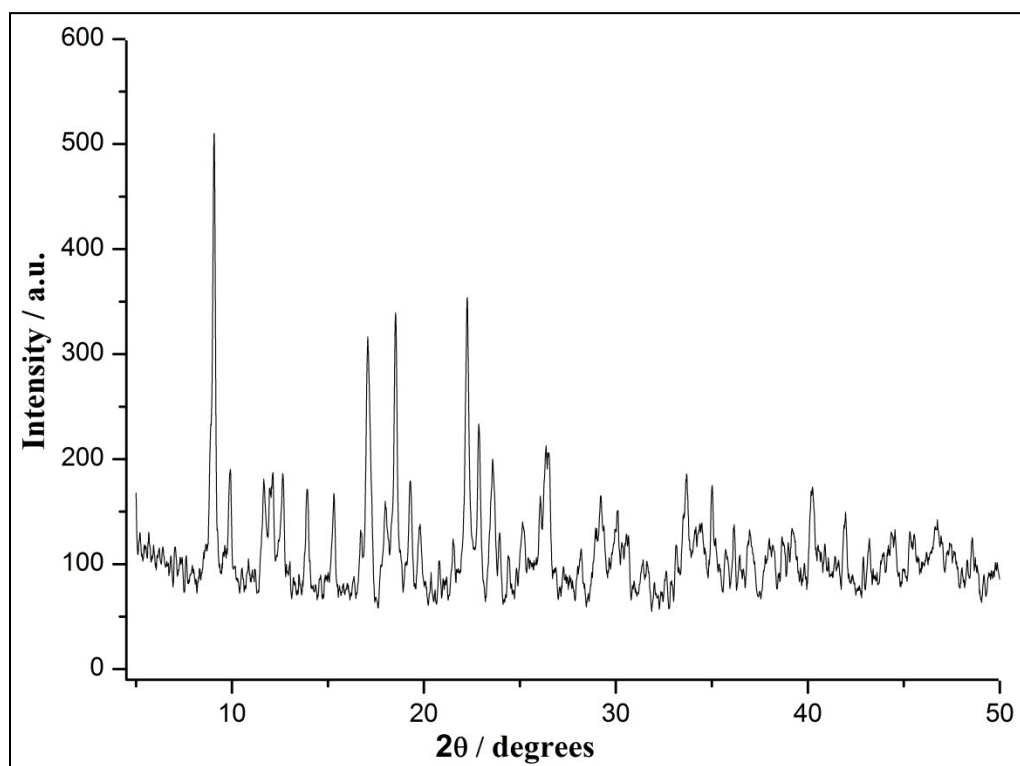

**Fig. S13:** Powder XRD pattern of complex **3**

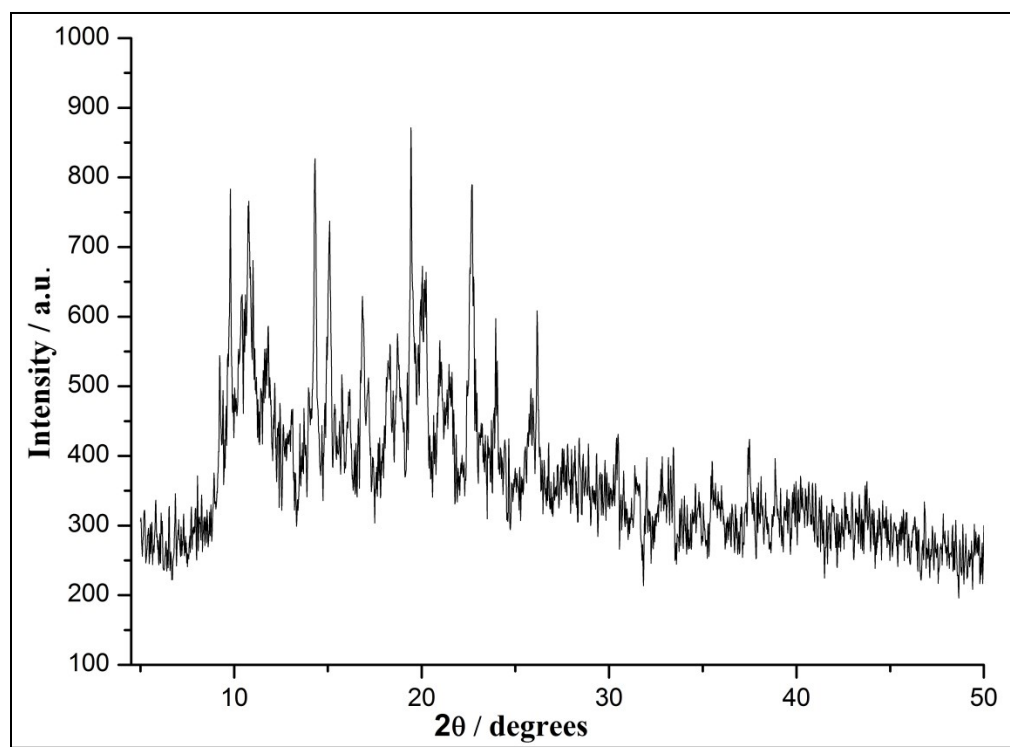

**Fig. S14:** Diagram showing the crystallite size of complexes **1-3**.

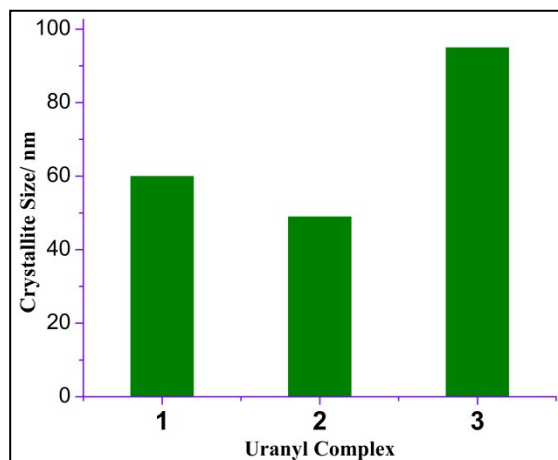

### Geometry of the ligand in XYZ format

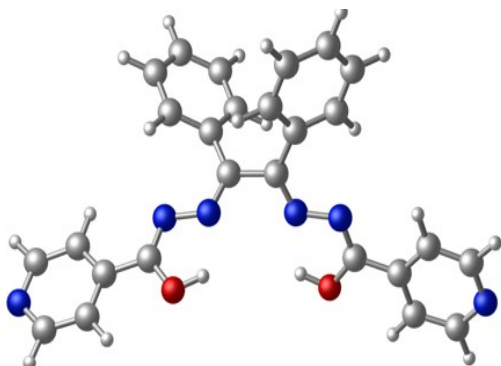

| Atoms | X        | Y        | Z        |
|-------|----------|----------|----------|
| C     | -0.74092 | 0.7856   | -0.13664 |
| C     | 0.74093  | 0.78559  | 0.13664  |
| C     | -1.31048 | 1.93065  | -0.88485 |
| C     | -0.52002 | 2.5611   | -1.86577 |
| C     | -2.60612 | 2.42667  | -0.64295 |
| C     | -1.01303 | 3.64228  | -2.59428 |
| H     | 0.47673  | 2.19363  | -2.06688 |
| C     | -3.0886  | 3.51948  | -1.3621  |
| H     | -3.22519 | 1.95082  | 0.09879  |
| C     | -2.29849 | 4.12799  | -2.3417  |
| H     | -0.39529 | 4.106    | -3.35129 |
| H     | -4.0823  | 3.89534  | -1.15852 |
| H     | -2.67977 | 4.97225  | -2.90031 |
| C     | 1.3105   | 1.93066  | 0.88483  |
| C     | 0.52002  | 2.56113  | 1.86572  |
| C     | 2.60616  | 2.42665  | 0.64297  |
| C     | 1.01302  | 3.64231  | 2.59424  |
| H     | -0.47674 | 2.19368  | 2.06679  |
| C     | 3.08862  | 3.51946  | 1.36214  |
| H     | 3.22528  | 1.95077  | -0.09871 |
| C     | 2.29849  | 4.12801  | 2.34169  |
| H     | 0.39525  | 4.10605  | 3.35121  |
| H     | 4.08235  | 3.8953   | 1.15859  |
| H     | 2.67976  | 4.97227  | 2.9003   |
| N     | 1.36186  | -0.26506 | -0.31687 |
| N     | -1.36187 | -0.26505 | 0.31687  |
| N     | -2.74536 | -0.41241 | 0.0437   |
| N     | 2.74538  | -0.41238 | -0.04375 |
| C     | -3.19169 | -1.51109 | 0.60336  |
| C     | 3.19167  | -1.51112 | -0.60331 |
| O     | -2.40082 | -2.33273 | 1.35273  |
| O     | 2.40075  | -2.33287 | -1.35251 |
| C     | -4.58658 | -1.93615 | 0.45443  |
| C     | -5.47598 | -1.21437 | -0.35747 |
| C     | -5.06078 | -3.07634 | 1.11918  |
| C     | -6.79095 | -1.65647 | -0.46677 |
| H     | -5.13239 | -0.33917 | -0.88737 |
| C     | -6.3952  | -3.44321 | 0.95067  |
| H     | -4.39958 | -3.65305 | 1.74694  |
| N     | -7.25888 | -2.75343 | 0.17366  |

|   |          |          |          |
|---|----------|----------|----------|
| H | -7.50646 | -1.13064 | -1.08304 |
| H | -6.79949 | -4.31442 | 1.44651  |
| C | 4.58657  | -1.93617 | -0.45442 |
| C | 5.06075  | -3.07638 | -1.11914 |
| C | 5.476    | -1.21435 | 0.35741  |
| C | 6.39519  | -3.44323 | -0.95069 |
| H | 4.39953  | -3.65313 | -1.74685 |
| C | 6.79099  | -1.65643 | 0.46667  |
| H | 5.13243  | -0.33915 | 0.88731  |
| N | 7.2589   | -2.75342 | -0.17374 |
| H | 6.79945  | -4.31446 | -1.44651 |
| H | 7.50652  | -1.13058 | 1.08289  |
| H | -1.49304 | -1.93905 | 1.34251  |
| H | 1.49297  | -1.93919 | -1.34231 |

Geometry of the uranyl complex **1** in XYZ format

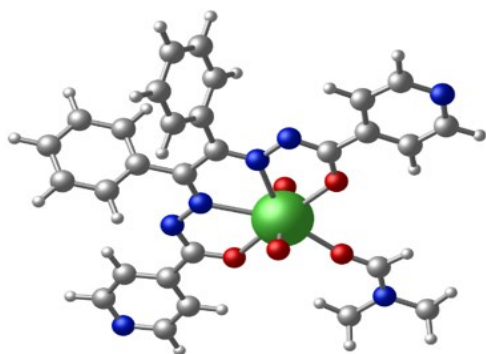

| Atoms | X        | Y        | Z        |
|-------|----------|----------|----------|
| U     | 12.73056 | 9.28959  | 8.69726  |
| O     | 14.72899 | 8.10764  | 8.40243  |
| O     | 13.86953 | 11.13398 | 7.81599  |
| O     | 11.86482 | 7.26760  | 9.47738  |
| O     | 12.17564 | 8.86885  | 7.07651  |
| O     | 13.21641 | 9.73580  | 10.33440 |
| N     | 16.63024 | 6.99447  | 8.71586  |
| N     | 12.06169 | 12.55802 | 8.00453  |
| N     | 11.43522 | 11.44852 | 8.53588  |
| N     | 10.36650 | 9.32509  | 9.53615  |
| N     | 9.79752  | 8.15132  | 9.99159  |
| N     | 15.53176 | 15.52180 | 5.99544  |
| N     | 9.28816  | 3.35780  | 11.25018 |
| C     | 10.24934 | 11.61282 | 9.02561  |
| C     | 10.65925 | 7.16023  | 9.91201  |
| C     | 8.24611  | 10.40493 | 10.10545 |
| C     | 10.18337 | 5.84677  | 10.37847 |
| C     | 13.29958 | 12.27344 | 7.66418  |
| C     | 9.61984  | 10.39536 | 9.57410  |
| C     | 7.18879  | 10.81189 | 9.31455  |
| H     | 7.33944  | 11.06674 | 8.43304  |
| C     | 9.54599  | 12.90902 | 9.09539  |

|   |          |          |          |
|---|----------|----------|----------|
| C | 7.99335  | 10.03131 | 11.41913 |
| H | 8.68941  | 9.72700  | 11.95538 |
| C | 5.91232  | 10.84154 | 9.83120  |
| H | 5.20220  | 11.09515 | 9.28639  |
| C | 10.78190 | 4.68178  | 9.96098  |
| H | 11.50585 | 4.70470  | 9.37821  |
| C | 15.72653 | 7.50586  | 7.96291  |
| H | 15.82157 | 7.42287  | 7.04223  |
| C | 5.67572  | 10.50123 | 11.13999 |
| H | 4.81282  | 10.53805 | 11.48647 |
| C | 14.06450 | 13.38512 | 7.05937  |
| C | 6.71614  | 10.10800 | 11.92967 |
| H | 6.56227  | 9.89120  | 12.82097 |
| C | 9.04409  | 13.35578 | 10.30624 |
| H | 9.16625  | 12.84867 | 11.07633 |
| C | 15.44369 | 13.34186 | 6.96387  |
| H | 15.91275 | 12.59013 | 7.24669  |
| C | 9.36207  | 13.68399 | 7.95434  |
| H | 9.70849  | 13.39988 | 7.14017  |
| C | 9.12960  | 5.73541  | 11.27711 |
| H | 8.70243  | 6.49468  | 11.60400 |
| C | 8.72750  | 4.47050  | 11.67869 |
| H | 8.02449  | 4.40421  | 12.28227 |
| C | 13.43374 | 14.50396 | 6.55250  |
| H | 12.50549 | 14.56594 | 6.55006  |
| C | 8.17359  | 15.32570 | 9.22272  |
| H | 7.71991  | 16.13635 | 9.26680  |
| C | 10.29065 | 3.47902  | 10.42132 |
| H | 10.70082 | 2.70026  | 10.12014 |
| C | 16.11369 | 14.42713 | 6.44354  |
| H | 17.04230 | 14.38421 | 6.40559  |
| C | 16.60045 | 7.11837  | 10.15075 |
| H | 17.36539 | 6.67583  | 10.52661 |
| H | 15.79795 | 6.71630  | 10.48988 |
| H | 16.61922 | 8.04727  | 10.39194 |
| C | 14.21127 | 15.52708 | 6.04686  |
| H | 13.77156 | 16.27830 | 5.71875  |
| C | 8.66220  | 14.87705 | 8.03024  |
| H | 8.52339  | 15.37846 | 7.25893  |
| C | 8.35711  | 14.56382 | 10.36868 |
| H | 8.01760  | 14.86165 | 11.18162 |
| C | 17.75229 | 6.27691  | 8.14533  |
| H | 18.32763 | 5.96944  | 8.85053  |
| H | 18.24429 | 6.86129  | 7.56378  |
| H | 17.43002 | 5.52497  | 7.64459  |
